# Supplementary material
Source: HighWire-hosted journal article supplement (https://erj.ersjournals.com/content/52/3/1800218)
Supplement: inline-supplementary-material-1 [file inline-supplementary-material-1.pdf]

**SUPPLEMENTARY MATERIAL**

**Air pollution exposure and lung function until age 16: The PIAMA birth cohort study.**

**Edith B Milanzi, Gerard H Koppelman, Henriette A Smit, Alet H Wijga, Marieke Oldenwening, Judith M Vonk, Bert Brunekreef, and Ulrike Gehring**

**Table S1. Comparison of characteristics between baseline population and study populations <sup>α</sup>**

| Characteristic                            | Baseline population |      | Cross-sectional analyses population |      |                      | Longitudinal analyses population |      |                      |
|-------------------------------------------|---------------------|------|-------------------------------------|------|----------------------|----------------------------------|------|----------------------|
|                                           | (N=3963)            |      | (N=721)                             |      |                      | (N=915)                          |      |                      |
|                                           | n/N                 | %    | n/N                                 | %    | P-Value <sup>β</sup> | n/N                              | %    | P-value <sup>γ</sup> |
| Parental atopy                            |                     |      |                                     |      |                      |                                  |      |                      |
| Atopic mother                             | 1237/3963           | 31.2 | 232/720                             | 32.1 | 0.607                | 434/915                          | 47.4 | 0.000                |
| Atopic father                             | 1217/3957           | 30.7 | 242/720                             | 33.6 | 0.128                | 306/914                          | 33.5 | 0.041                |
| Boys                                      | 2054/3963           | 51.8 | 338/721                             | 46.8 | 0.014                | 434/915                          | 47.4 | 0.002                |
| Presence of pets at 3 months              | 1923/3947           | 48.7 | 312/718                             | 43.4 | 0.009                | 409/911                          | 44.9 | 0.008                |
| Presence of moulds at 1 year              | 1047/3702           | 28.3 | 193/708                             | 27.2 | 0.579                | 243/900                          | 27.1 | 0.326                |
| Breastfeeding > 12 weeks                  | 1892/3896           | 48.5 | 434/721                             | 60.2 | <0.000               | 534/915                          | 58.4 | <0.000               |
| Gas cooking at 3 months                   | 3247/3923           | 82.7 | 613/718                             | 85.3 | 0.085                | 771/910                          | 84.7 | 0.074                |
| Maternal smoking during pregnancy         | 700/3926            | 17.8 | 92/716                              | 12.8 | 0.001                | 72/863                           | 13.6 | 0.000                |
| Indoor tobacco smoke exposure at 3 months | 1129/3963           | 28.4 | 146/721                             | 20.2 | <0.000               | 124/910                          | 20.9 | <0.000               |
| Parental education                        |                     |      |                                     |      | <0.000               |                                  |      | <0.000               |
| Low                                       | 502/3812            | 13.1 | 53/721                              | 7.3  |                      | 75/914                           | 8.2  |                      |
| Intermediate                              | 1402/3812           | 36.7 | 215/721                             | 29.8 |                      | 282/914                          | 30.8 |                      |
| High                                      | 1908/3812           | 50.1 | 453/721                             | 62.8 |                      | 557/914                          | 60.9 |                      |
| Dutch nationality                         | 3485/3700           | 94.1 | 686/707                             | 97.1 | 0.002                | 872/904                          | 96.5 | 0.000                |
| Asthma at age 16                          | 66/767              | 8.6  | 59/691                              | 8.5  | 0.649                | 55/607                           | 9.1  | 0.085                |

<sup>α</sup> Continuous characteristics compared by t-tests and categorical characteristics compared using Chi-Square tests

<sup>β</sup>: Comparison of baseline population and the cross-sectional analyses data

<sup>γ</sup>: Comparison of baseline population and the longitudinal analyses data.

**Table S2. Comparison of characteristics between non- movers and movers in cross-sectional analyses study population (N=721)<sup>α</sup>**

| Characteristic                                                             | Non-Movers<br>(N=268) |      | Movers<br>(N=453) |      | P-Value |
|----------------------------------------------------------------------------|-----------------------|------|-------------------|------|---------|
|                                                                            | n/N                   | (%)  | n/N               | (%)  |         |
| Parental atopy                                                             |                       |      |                   |      |         |
| Atopic mother                                                              | 83/268                | 30.9 | 149/453           | 32.8 | 0.593   |
| Atopic father                                                              | 91/268                | 33.9 | 151/452           | 33.5 | 0.880   |
| Boys                                                                       | 139/268               | 51.8 | 199/453           | 43.9 | 0.039   |
| Presence of pets at 3 months                                               | 118/268               | 44.1 | 94/450            | 43.1 | 0.810   |
| Presence of moulds at 1 year                                               | 72/258                | 27.3 | 121/445           | 27.2 | 0.957   |
| Breastfeeding > 12 weeks                                                   | 159/268               | 59.3 | 275/453           | 60.7 | 0.714   |
| Gas cooking at 3 months                                                    | 221/265               | 16.6 | 392//453          | 86.5 | 0.250   |
| Maternal smoking during pregnancy                                          | 32/266                | 12.1 | 60/450            | 13.3 | 0.614   |
| Indoor tobacco smoke exposure at 3 months                                  | 54/268                | 20.1 | 92/453            | 20.3 | 0.958   |
| Parental education                                                         |                       |      |                   |      | 0.000   |
| Low                                                                        | 26/268                | 9.7  | 27/453            | 5.9  |         |
| Intermediate                                                               | 99/268                | 36.9 | 116/453           | 25.7 |         |
| High                                                                       | 143/268               | 53.3 | 310/453           | 68.4 |         |
| Dutch nationality                                                          | 254/261               | 97.3 | 432/446           | 96.7 | 0.729   |
| Respiratory infections in the 3 weeks before the lung function measurement | 109/268               | 40.6 | 194/453           | 42.8 | 0.571   |
| <b>N, Mean (SD)</b>                                                        |                       |      |                   |      |         |
| Age (years) <sup>β</sup>                                                   | 268, 16.3 (0.2)       |      | 453, 16.3 (0.2)   |      | 0.643   |
| Weight (kg) <sup>β</sup>                                                   | 268, 64.9 (10.3)      |      | 453, 63.8 (10.1)  |      | 0.160   |
| Height (cm) <sup>β</sup>                                                   | 268, 175.9 (8.2)      |      | 453, 175.7 (8.9)  |      | 0.246   |
| FEV1 (L) <sup>β</sup>                                                      | 268, 4.1 (0.7)        |      | 453, 3.9 (0.7)    |      | 0.037   |
| FVC (L) <sup>β</sup>                                                       | 268, 4.7 (0.8)        |      | 453, 4.6 ( 0.8)   |      | 0.111   |

α: Continuous characteristics compared by t-tests and categorical characteristics compared using Chi-Square tests.

β: at the time of the 16-year lung function measurements

**Table S3. Distribution of annual average concentrations of air pollution for different time windows of exposure, and short-term exposures for longitudinal analyses population, N=915.**

|                                                    | Min  | Median | Mean (SD)   | IQR  | 75th Percentile | Max  |
|----------------------------------------------------|------|--------|-------------|------|-----------------|------|
| <b>Preschool</b>                                   |      |        |             |      |                 |      |
| NO <sub>2</sub> (µg/m <sup>3</sup> )               | 10.3 | 22.6   | 22.4 (6.2)  | 8.2  | 26.3            | 52.4 |
| PM <sub>2.5</sub> absorbance (10 <sup>-5</sup> /m) | 0.8  | 1.2    | 1.2 (0.2)   | 0.3  | 1.3             | 2.6  |
| PM <sub>2.5</sub> (µg/m <sup>3</sup> )             | 15.2 | 16.4   | 16.3 (0.6)  | 1.5  | 16.7            | 19.4 |
| PM <sub>10</sub> (µg/m <sup>3</sup> )              | 23.7 | 24.5   | 24.7 (0.9)  | 0.9  | 25.0            | 29.8 |
| PM <sub>coarse</sub> (µg/m <sup>3</sup> )          | 7.6  | 8.1    | 8.3 (0.6)   | 0.7  | 8.5             | 12.3 |
| <b>Primary school</b>                              |      |        |             |      |                 |      |
| NO <sub>2</sub> (µg/m <sup>3</sup> )               | 10.3 | 22.0   | 21.8 (5.8)  | 8.4  | 25.8            | 47.7 |
| PM <sub>2.5</sub> absorbance (10 <sup>-5</sup> /m) | 0.8  | 1.2    | 1.1 (0.2)   | 0.3  | 1.3             | 2.0  |
| PM <sub>2.5</sub> (µg/m <sup>3</sup> )             | 14.9 | 16.4   | 16.2 (0.6)  | 1.1  | 16.7            | 19.4 |
| PM <sub>10</sub> (µg/m <sup>3</sup> )              | 23.7 | 24.4   | 24.6 (0.8)  | 0.9  | 24.9            | 29.8 |
| PM <sub>coarse</sub> (µg/m <sup>3</sup> )          | 7.6  | 8.0    | 8.2 (0.6)   | 0.6  | 8.43            | 11.4 |
| <b>Secondary school</b>                            |      |        |             |      |                 |      |
| NO <sub>2</sub> (µg/m <sup>3</sup> )               | 10.0 | 21.8   | 21.5 (5.8)  | 8.6  | 25.56           | 47.7 |
| PM <sub>2.5</sub> absorbance (10 <sup>-5</sup> /m) | 0.8  | 1.1    | 1.1 (0.2)   | 0.3  | 1.30            | 2.0  |
| PM <sub>2.5</sub> (µg/m <sup>3</sup> )             | 14.9 | 16.4   | 16.2 (0.6)  | 1.1  | 16.6            | 18.6 |
| PM <sub>10</sub> (µg/m <sup>3</sup> )              | 23.7 | 24.4   | 24.5 (0.8)  | 0.8  | 24.8            | 29.8 |
| PM <sub>coarse</sub> (µg/m <sup>3</sup> )          | 7.60 | 8.0    | 8.2 (0.6)   | 0.6  | 8.3             | 11.4 |
| <b>Short term exposure<sup>a</sup></b>             |      |        |             |      |                 |      |
| NO <sub>2</sub> (µg/m <sup>3</sup> )               |      |        |             |      |                 |      |
| 8 year med. exam                                   | 2.7  | 19.2   | 21.4 (10.3) | 14.6 | 28.7            | 55.7 |
| 12 year med. exam                                  | 4.0  | 15.6   | 20.1 (9.9)  | 11.1 | 22.8            | 62.1 |
| 16 year med. exam                                  | 4.1  | 14.7   | 15.9 (6.9)  | 9.7  | 20.2            | 42.8 |
| PM <sub>10</sub> (µg/m <sup>3</sup> )              |      |        |             |      |                 |      |
| 8 year med. exam                                   | 12.5 | 25.5   | 28.0 (9.5)  | 11.1 | 32.3            | 74.7 |
| 12 year med. exam                                  | 8.8  | 20.8   | 23.1 (9.6)  | 11.1 | 27.7            | 70.5 |
| 16 year med. exam                                  | 8.3  | 16.1   | 18.1 (6.8)  | 7.2  | 20.7            | 46.5 |

a: average concentrations of 7 days preceding the respective lung function measurements.

**Table S4. Mean difference between preschool and secondary school exposure for movers (N=453)**

|                                                    | Mean (SD)   | (Min, Max)  |
|----------------------------------------------------|-------------|-------------|
| NO <sub>2</sub> (µg/m <sup>3</sup> )               | -1.65 (5.1) | -19.2, 17.5 |
| PM <sub>2.5</sub> absorbance (10 <sup>-5</sup> /m) | -0.05 (0.1) | -1.2, 0.6   |
| PM <sub>2.5</sub> (µg/m <sup>3</sup> )             | -0.08 (0.6) | -3.6, 2.7   |
| PM <sub>10</sub> (µg/m <sup>3</sup> )              | -0.26 (0.9) | -5.1, 3.3   |
| PM <sub>coarse</sub> (µg/m <sup>3</sup> )          | -0.14 (0.6) | -2.3, 1.8   |

Table S5. Correlation matrix of time window average concentrations of air pollution for the cross-sectional analyses population (N=721)<sup>a</sup>

|                                    | NO <sub>2</sub> |             |             | PM <sub>2.5</sub> absorbance |             |             | PM <sub>2.5</sub> |             |             | PM <sub>10</sub> |             |             | PM <sub>coarse</sub> |             |             |
|------------------------------------|-----------------|-------------|-------------|------------------------------|-------------|-------------|-------------------|-------------|-------------|------------------|-------------|-------------|----------------------|-------------|-------------|
|                                    | Birth-4         | 5-12        | 13-16       | Birth-4                      | 5-12        | 13-16       | Birth-4           | 5-12        | 13-16       | Birth-4          | 5-12        | 13-16       | Birth-4              | 5-12        | 13-16       |
| <b>NO<sub>2</sub></b>              |                 |             |             |                              |             |             |                   |             |             |                  |             |             |                      |             |             |
| Birth-4                            | 1.00            | <b>0.89</b> | <b>0.80</b> | <b>0.87</b>                  | 0.78        | 0.71        | 0.71              | 0.65        | 0.61        | 0.70             | 0.58        | 0.52        | 0.73                 | 0.63        | 0.56        |
| 5-12                               |                 | 1.00        | <b>0.94</b> | 0.79                         | <b>0.86</b> | <b>0.82</b> | 0.67              | 0.71        | 0.69        | 0.60             | 0.67        | 0.63        | 0.63                 | 0.72        | 0.69        |
| 13-16                              |                 |             | 1.00        | 0.71                         | <b>0.80</b> | <b>0.85</b> | 0.61              | 0.67        | 0.69        | 0.51             | 0.62        | 0.67        | 0.54                 | 0.67        | 0.72        |
| <b>PM<sub>2.5</sub> absorbance</b> |                 |             |             |                              |             |             |                   |             |             |                  |             |             |                      |             |             |
| Birth-4                            |                 |             |             | 1.00                         | <b>0.89</b> | 0.80        | <b>0.91</b>       | <b>0.82</b> | 0.75        | <b>0.86</b>      | 0.70        | 0.61        | 0.72                 | 0.64        | 0.55        |
| 5-12                               |                 |             |             |                              | 1.00        | <b>0.93</b> | 0.83              | <b>0.91</b> | <b>0.86</b> | 0.72             | <b>0.85</b> | 0.78        | 0.62                 | 0.72        | 0.66        |
| 13-16                              |                 |             |             |                              |             | 1.00        | 0.74              | <b>0.86</b> | <b>0.89</b> | 0.61             | 0.77        | <b>0.84</b> | 0.54                 | 0.67        | 0.70        |
| <b>PM<sub>2.5</sub></b>            |                 |             |             |                              |             |             |                   |             |             |                  |             |             |                      |             |             |
| Birth-4                            |                 |             |             |                              |             |             | 1.00              | <b>0.90</b> | <b>0.82</b> | 0.67             | 0.56        | 0.46        | 0.56                 | 0.52        | 0.44        |
| 5-12                               |                 |             |             |                              |             |             |                   | 1.00        | <b>0.96</b> | 0.57             | 0.65        | 0.61        | 0.49                 | 0.57        | 0.51        |
| 13-16                              |                 |             |             |                              |             |             |                   |             | 1.00        | 0.48             | 0.59        | 0.64        | 0.43                 | 0.53        | 0.53        |
| <b>PM<sub>10</sub></b>             |                 |             |             |                              |             |             |                   |             |             |                  |             |             |                      |             |             |
| Birth-4                            |                 |             |             |                              |             |             |                   |             |             | 1.00             | 0.78        | 0.65        | 0.77                 | 0.63        | 0.52        |
| 5-12                               |                 |             |             |                              |             |             |                   |             |             |                  | 1.00        | <b>0.91</b> | 0.61                 | 0.75        | 0.67        |
| 13-16                              |                 |             |             |                              |             |             |                   |             |             |                  |             | 1.00        | 0.52                 | 0.68        | 0.72        |
| <b>PM<sub>coarse</sub></b>         |                 |             |             |                              |             |             |                   |             |             |                  |             |             |                      |             |             |
| Birth-4                            |                 |             |             |                              |             |             |                   |             |             |                  |             |             | 1.00                 | <b>0.82</b> | 0.66        |
| 5-12                               |                 |             |             |                              |             |             |                   |             |             |                  |             |             |                      | 1.00        | <b>0.90</b> |
| 13-16                              |                 |             |             |                              |             |             |                   |             |             |                  |             |             |                      |             | 1.00        |

<sup>a</sup>: Birth-4=Preschool, 5-12=Primary school, 13-16=secondary school. High correlations (r≥0.80) are presented in bold font

Table S6. Correlation matrix of time window average concentrations of air pollution for the longitudinal analyses population (N=915)<sup>a</sup>

|                                    | NO <sub>2</sub> |             |             | PM <sub>2.5</sub> absorbance |             |             | PM <sub>2.5</sub> |             |             | PM <sub>10</sub> |             |             | PM <sub>coarse</sub> |             |             |
|------------------------------------|-----------------|-------------|-------------|------------------------------|-------------|-------------|-------------------|-------------|-------------|------------------|-------------|-------------|----------------------|-------------|-------------|
|                                    | Birth-4         | 5-12        | 13-16       | Birth-4                      | 5-12        | 13-16       | Birth-4           | 5-12        | 13-16       | Birth-4          | 5-12        | 13-16       | Birth-4              | 5-12        | 13-16       |
| <b>NO<sub>2</sub></b>              |                 |             |             |                              |             |             |                   |             |             |                  |             |             |                      |             |             |
| Birth-4                            | 1.00            | <b>0.92</b> | <b>0.84</b> | 0.74                         | 0.67        | 0.62        | 0.76              | 0.67        | 0.57        | <b>0.90</b>      | <b>0.83</b> | 0.76        | 0.75                 | 0.67        | 0.59        |
| 5-12                               |                 | 1.00        | <b>0.95</b> | 0.70                         | 0.72        | 0.69        | 0.68              | 0.73        | 0.67        | <b>0.83</b>      | <b>0.89</b> | <b>0.85</b> | 0.68                 | 0.74        | 0.69        |
| 13-16                              |                 |             | 1.00        | 0.64                         | 0.69        | 0.70        | 0.60              | 0.68        | 0.70        | 0.76             | <b>0.85</b> | <b>0.88</b> | 0.62                 | 0.71        | 0.73        |
| <b>PM<sub>2.5</sub> absorbance</b> |                 |             |             |                              |             |             |                   |             |             |                  |             |             |                      |             |             |
| Birth-4                            |                 |             |             | 1.00                         | <b>0.90</b> | <b>0.81</b> | 0.65              | 0.56        | 0.46        | <b>0.89</b>      | <b>0.82</b> | 0.73        | 0.58                 | 0.50        | 0.42        |
| 5-12                               |                 |             |             |                              | 1.00        | <b>0.95</b> | 0.56              | 0.62        | 0.57        | 0.79             | <b>0.88</b> | <b>0.84</b> | 0.49                 | 0.54        | 0.49        |
| 13-16                              |                 |             |             |                              |             | 1.00        | 0.48              | 0.57        | 0.61        | 0.71             | <b>0.83</b> | <b>0.87</b> | 0.44                 | 0.51        | 0.51        |
| <b>PM<sub>2.5</sub></b>            |                 |             |             |                              |             |             |                   |             |             |                  |             |             |                      |             |             |
| Birth-4                            |                 |             |             |                              |             |             | 1.00              | <b>0.86</b> | 0.70        | <b>0.87</b>      | 0.76        | 0.66        | <b>0.80</b>          | 0.68        | 0.57        |
| 5-12                               |                 |             |             |                              |             |             |                   | 1.00        | <b>0.91</b> | 0.75             | 0.85        | <b>0.80</b> | 0.69                 | 0.76        | 0.70        |
| 13-16                              |                 |             |             |                              |             |             |                   |             | 1.00        | 0.63             | 0.78        | <b>0.85</b> | 0.58                 | 0.70        | 0.74        |
| <b>PM<sub>10</sub></b>             |                 |             |             |                              |             |             |                   |             |             |                  |             |             |                      |             |             |
| Birth-4                            |                 |             |             |                              |             |             |                   |             |             | 1.00             | <b>0.91</b> | <b>0.81</b> | 0.75                 | 0.65        | 0.56        |
| 5-12                               |                 |             |             |                              |             |             |                   |             |             |                  | 1.00        | <b>0.95</b> | 0.66                 | 0.72        | 0.66        |
| 13-16                              |                 |             |             |                              |             |             |                   |             |             |                  |             | 1.00        | 0.60                 | 0.69        | 0.70        |
| <b>PM<sub>coarse</sub></b>         |                 |             |             |                              |             |             |                   |             |             |                  |             |             |                      |             |             |
| Birth-4                            |                 |             |             |                              |             |             |                   |             |             |                  |             |             | 1.00                 | <b>0.85</b> | 0.72        |
| 5-12                               |                 |             |             |                              |             |             |                   |             |             |                  |             |             |                      | 1.00        | <b>0.93</b> |
| 13-16                              |                 |             |             |                              |             |             |                   |             |             |                  |             |             |                      |             | 1.00        |

<sup>a</sup>: Birth-4=Preschool, 5-12=Primary school, 13-16=secondary school. High correlations (r≥0.80) are presented in bold font

Table S7. Correlation matrix of time window average concentrations of air pollution for participants who changed address since birth (N=453)<sup>a</sup>

|                                    | NO <sub>2</sub> |             |             | PM <sub>2.5</sub> absorbance |             |             | PM <sub>2.5</sub> |             |             | PM <sub>10</sub> |      |             | PM <sub>coarse</sub> |             |       |
|------------------------------------|-----------------|-------------|-------------|------------------------------|-------------|-------------|-------------------|-------------|-------------|------------------|------|-------------|----------------------|-------------|-------|
|                                    | Birth-4         | 5-12        | 13-16       | Birth-4                      | 5-12        | 13-16       | Birth-4           | 5-12        | 13-16       | Birth-4          | 5-12 | 13-16       | Birth-4              | 5-12        | 13-16 |
| <b>NO<sub>2</sub></b>              |                 |             |             |                              |             |             |                   |             |             |                  |      |             |                      |             |       |
| Birth-4                            | 1.00            | <b>0.83</b> | 0.67        | <b>0.88</b>                  | 0.67        | 0.62        | 0.70              | 0.59        | 0.57        | 0.67             | 0.56 | 0.41        | 0.69                 | 0.62        | 0.47  |
| 5-12                               |                 | 1.00        | <b>0.87</b> | 0.76                         | <b>0.83</b> | 0.78        | 0.67              | 0.69        | 0.68        | 0.59             | 0.69 | 0.59        | 0.63                 | 0.74        | 0.66  |
| 13-16                              |                 |             | 1.00        | 0.62                         | <b>0.80</b> | <b>0.85</b> | 0.56              | 0.67        | 0.69        | 0.43             | 0.56 | 0.68        | 0.47                 | 0.62        | 0.75  |
| <b>PM<sub>2.5</sub> absorbance</b> |                 |             |             |                              |             |             |                   |             |             |                  |      |             |                      |             |       |
| Birth-4                            |                 |             |             | 1.00                         | 0.74        | 0.67        | <b>0.88</b>       | 0.69        | 0.65        | <b>0.81</b>      | 0.66 | 0.44        | 0.69                 | 0.61        | 0.45  |
| 5-12                               |                 |             |             |                              | 1.00        | <b>0.91</b> | 0.72              | <b>0.90</b> | <b>0.84</b> | 0.57             | 0.78 | 0.75        | 0.52                 | 0.67        | 0.66  |
| 13-16                              |                 |             |             |                              |             | 1.00        | 0.66              | <b>0.84</b> | <b>0.88</b> | 0.49             | 0.67 | <b>0.84</b> | 0.47                 | 0.61        | 0.69  |
| <b>PM<sub>2.5</sub></b>            |                 |             |             |                              |             |             |                   |             |             |                  |      |             |                      |             |       |
| Birth-4                            |                 |             |             |                              |             |             | 1.00              | 0.79        | 0.74        | 0.67             | 0.56 | 0.36        | 0.56                 | 0.52        | 0.39  |
| 5-12                               |                 |             |             |                              |             |             |                   | 1.00        | <b>0.95</b> | 0.45             | 0.60 | 0.58        | 0.42                 | 0.54        | 0.51  |
| 13-16                              |                 |             |             |                              |             |             |                   |             | 1.00        | 0.39             | 0.52 | 0.61        | 0.38                 | 0.50        | 0.53  |
| <b>PM<sub>10</sub></b>             |                 |             |             |                              |             |             |                   |             |             |                  |      |             |                      |             |       |
| Birth-4                            |                 |             |             |                              |             |             |                   |             |             | 1.00             | 0.77 | 0.48        | 0.76                 | 0.61        | 0.39  |
| 5-12                               |                 |             |             |                              |             |             |                   |             |             |                  | 1.00 | 0.77        | 0.60                 | 0.74        | 0.57  |
| 13-16                              |                 |             |             |                              |             |             |                   |             |             |                  |      | 1.00        | 0.39                 | 0.57        | 0.71  |
| <b>PM<sub>coarse</sub></b>         |                 |             |             |                              |             |             |                   |             |             |                  |      |             |                      |             |       |
| Birth-4                            |                 |             |             |                              |             |             |                   |             |             |                  |      |             | 1.00                 | <b>0.83</b> | 0.51  |
| 5-12                               |                 |             |             |                              |             |             |                   |             |             |                  |      |             |                      | 1.00        | 0.76  |
| 13-16                              |                 |             |             |                              |             |             |                   |             |             |                  |      |             |                      |             | 1.00  |

<sup>a</sup>: Birth-4=Preschool, 5-12=Primary school, 13-16=secondary school. ≥0.80=high correlation

**Table S8. Associations of time window average air pollution exposure with FEV<sub>1</sub> and FVC at age 16.**

| Exposure                     | Difference in FEV <sub>1</sub> : % (95% CI) |                                            | Difference in FVC: % (95% CI)           |                                            |
|------------------------------|---------------------------------------------|--------------------------------------------|-----------------------------------------|--------------------------------------------|
|                              | Minimally adjusted (N=719) <sup>α</sup>     | Additionally adjusted (N=671) <sup>β</sup> | Minimally adjusted (N=719) <sup>α</sup> | Additionally adjusted (N=671) <sup>β</sup> |
| <b>Preschool</b>             |                                             |                                            |                                         |                                            |
| NO <sub>2</sub>              | -0.92 (-2.04 to 0.20)                       | -1.52 (-2.81 to -0.22)                     | 0.02 (-0.94 to 1.00)                    | -0.50 (-1.61 to 0.63)                      |
| PM <sub>2.5</sub> absorbance | -1.37 (-2.51 to -0.21)                      | -1.71 (-2.91 to -0.49)                     | -0.00 (-1.00 to 1.00)                   | -0.23 (-1.28 to 0.83)                      |
| PM <sub>2.5</sub>            | -1.79 (-3.11 to -0.44)                      | -2.14 (-3.53 to -0.73)                     | 0.07 (-1.10 to 1.25)                    | -0.15 (-1.37 to 1.08)                      |
| PM <sub>10</sub>             | -0.88 (-1.81 to 0.06)                       | -1.07 (-2.05 to -0.08)                     | -0.12 (-0.92 to 0.70)                   | -0.27 (-1.12 to 0.58)                      |
| PM <sub>coarse</sub>         | -0.56 (-1.49 to 0.37)                       | -0.76 (-1.77 to 0.27)                      | -0.16 (-0.96 to 0.64)                   | -0.32 (-1.19 to 0.56)                      |
| <b>Primary school</b>        |                                             |                                            |                                         |                                            |
| NO <sub>2</sub>              | -1.34 (-2.50 to -0.16)                      | -2.15 (-3.48 to -0.80)                     | -0.35 (-1.36 to 0.67)                   | -0.99 (-2.14 to 0.18)                      |
| PM <sub>2.5</sub> absorbance | -1.74 (-2.90 to -0.57)                      | -2.08 (-3.29 to -0.86)                     | -0.43 (-1.45 to 0.59)                   | -0.63 (-1.68 to 0.44)                      |
| PM <sub>2.5</sub>            | -1.94 (-3.27 to -0.60)                      | -2.27 (-3.66 to -0.87)                     | -0.20 (-1.36 to 0.98)                   | -0.36 (-1.57 to 0.87)                      |
| PM <sub>10</sub>             | -1.12 (-2.08 to -0.16)                      | -1.32 (-2.31 to -0.32)                     | -0.46 (-1.29 to 0.37)                   | -0.58 (-1.43 to 0.29)                      |
| PM <sub>coarse</sub>         | -0.82 (-1.81 to 0.17)                       | -1.02 (-2.05 to 0.03)                      | -0.25 (-1.10 to 0.60)                   | -0.43 (-1.32 to 0.47)                      |
| <b>Secondary school</b>      |                                             |                                            |                                         |                                            |
| NO <sub>2</sub>              | -1.53 (-2.66 to -0.38)                      | -2.30 (-3.59 to -0.99)                     | -0.42 (-1.41 to 0.58)                   | -1.01 (-2.14 to 0.13)                      |
| PM <sub>2.5</sub> absorbance | -1.75 (-2.92 to -0.57)                      | -2.07 (-3.29 to -0.83)                     | -0.38 (-1.40 to 0.66)                   | -0.56 (-1.63 to 0.52)                      |
| PM <sub>2.5</sub>            | -2.08 (-3.41 to -0.72)                      | -2.36 (-3.76 to -0.94)                     | -0.30 (-1.48 to 0.89)                   | -0.46 (-1.69 to 0.78)                      |
| PM <sub>10</sub>             | -1.10 (-2.09 to -0.11)                      | -1.29 (-2.31 to -0.26)                     | -0.41 (-1.26 to 0.44)                   | -0.55 (-1.43 to 0.34)                      |
| PM <sub>coarse</sub>         | -1.27 (-2.27 to -0.27)                      | -1.41 (-2.45 to -0.36)                     | -0.42 (-1.29 to 0.45)                   | -0.64 (-1.54 to 0.26)                      |

α: Adjusted for sex, age, log-transformations of weight and height

β: Adjusted for sex, age, log-transformations of weight and height, parental education, maternal atopy, paternal atopy, breastfeeding, respiratory infections in the last 3 weeks, Dutch nationality, indoor tobacco smoke exposure in the home at 3 months, maternal smoking in pregnancy, furry pets at 3 months, mould in the home at 1 year, gas cooking at 3 months, and average air pollution concentrations for the 7 days preceding the lung function measurement.

Exposure increments: 7.8 µg/m<sup>3</sup> for NO<sub>2</sub>, 0.3 10<sup>-5</sup>/m for PM<sub>2.5</sub> absorbance, 1.2 µg/m<sup>3</sup> for PM<sub>2.5</sub>, 0.9 µg/m<sup>3</sup> for PM<sub>10</sub> and 0.5 µg/m<sup>3</sup> for PM<sub>coarse</sub>.



**Table S9. Association of preschool time window average air pollution exposure with FEV<sub>1</sub> and FVC growth stratified by asthma status and sex**

| Exposure                                         | Non-asthmatic (N=607)  | Asthmatic(N=55)        | P-Value for interaction | Boys (N=333)           | Girls (N=383)         | P-Value for interaction |
|--------------------------------------------------|------------------------|------------------------|-------------------------|------------------------|-----------------------|-------------------------|
| <b>Difference in FEV<sub>1</sub>: % (95% CI)</b> |                        |                        |                         |                        |                       |                         |
| NO <sub>2</sub>                                  | -0.22 (-0.43 to 0.00 ) | -0.33 (-1.04 to 0.39 ) | 0.56                    | -0.52 (-0.77 to -0.27) | -0.07 (-0.26 to 0.11) | 0.05                    |
| PM <sub>2.5</sub> absorbance                     | -0.20 (-0.42 to 0.03 ) | -0.40 (-1.15 to 0.36 ) | 0.44                    | -0.60 (-0.88 to -0.32) | -0.06 (-0.25 to 0.14) | 0.07                    |
| PM <sub>2.5</sub>                                | -0.13 (-0.40 to 0.14 ) | -0.44 (-1.37 to 0.49 ) | 0.31                    | -0.53 (-0.90 to -0.16) | -0.03 (-0.27 to 0.22) | 0.15                    |
| PM <sub>10</sub>                                 | -0.18 (-0.37 to 0.01)  | -0.26 (-0.89 to 0.37)  | 0.85                    | -0.42 (-0.61 to -0.22) | 0.01 (-0.12 to 0.14)  | 0.07                    |
| PM <sub>coarse</sub>                             | -0.14 (-0.30 to 0.02 ) | -0.13 (-0.66 to 0.40 ) | 0.34                    | -0.37 (-0.54 to -0.20) | 0.05 (-0.06 to 0.16)  | 0.70                    |
| <b>Difference in FVC: % (95% CI)</b>             |                        |                        |                         |                        |                       |                         |
| NO <sub>2</sub>                                  | 0.02 (-0.18 to 0.22)   | 0.07 (-0.64 to 0.78 )  | 0.69                    | -0.14 (-0.36 to 0.08)  | 0.18 (-0.01 to 0.37)  | 0.43                    |
| PM <sub>2.5</sub> absorbance                     | 0.11 (-0.09 to 0.32)   | 0.04 (-0.70 to 0.79 )  | 0.54                    | -0.17 (-0.41 to 0.07)  | 0.30 (0.10 to 0.50)   | 0.42                    |
| PM <sub>2.5</sub>                                | 0.26 (0.02 to 0.51)    | 0.18 (-0.73 to 1.09 )  | 0.73                    | -0.03 (-0.43 to 0.36)  | 0.49 (0.24 to 0.74)   | 0.38                    |
| PM <sub>10</sub>                                 | -0.02 (-0.19 to 0.15)  | -0.13 (-0.74 to 0.49 ) | 0.26                    | -0.17 (-0.34 to -0.00) | 0.15 (0.01 to 0.28)   | 0.51                    |
| PM <sub>coarse</sub>                             | -0.01 (-0.15 to 0.13)  | -0.06 (-0.57 to 0.46 ) | 0.83                    | -0.14 (-0.29 to 0.01)  | 0.15 (0.03 to 0.26)   | 0.71                    |

Adjusted for sex, age, log-transformations of weight and height, parental education, maternal atopy, paternal atopy, breastfeeding, respiratory infections in the last 3 weeks, Dutch nationality, indoor tobacco smoke exposure in the home at 3 months, maternal smoking in pregnancy, furry pets at 3 months, mould in the home at 1 year, gas cooking at 3 months, and average air pollution concentrations for the 7 days preceding the lung function measurement.

Exposure increments: 7.8 µg/m<sup>3</sup> for NO<sub>2</sub>, 0.3 10<sup>-5</sup>/m for PM<sub>2.5</sub> absorbance, 1.2 µg/m<sup>3</sup> for PM<sub>2.5</sub>, 0.9 µg/m<sup>3</sup> for PM<sub>10</sub> and 0.5 µg/m<sup>3</sup> for PM<sub>coarse</sub>.

**Table S10. Association of time window average air pollution exposure with FEV<sub>1</sub> and FVC at age 16 stratified by sex**

| Exposure                     | Difference in FEV <sub>1</sub> : % (95% CI) |                       |                         | Difference in FVC: % (95% CI) |                       |                         |
|------------------------------|---------------------------------------------|-----------------------|-------------------------|-------------------------------|-----------------------|-------------------------|
|                              | Boys (N=338)                                | Girls (N=383)         | P-Value for interaction | Boys (N=338)                  | Girls (N=383)         | P-Value for interaction |
| <b>Preschool</b>             |                                             |                       |                         |                               |                       |                         |
| NO <sub>2</sub>              | -2.85 (-4.81 to -0.85)                      | -0.18 (-1.94 to 1.61) | 0.03                    | -1.52 (-3.20 to 0.19)         | 0.59 (-0.93 to 2.13)  | 0.01                    |
| PM <sub>2.5</sub> absorbance | -3.13 (-4.96 to -1.26)                      | -0.27 (-1.90 to 1.39) | 0.02                    | -1.83 (-3.41 to -0.22)        | 1.17 (-0.27 to 2.62)  | 0.00                    |
| PM <sub>2.5</sub>            | -3.66 (-5.77 to -1.50)                      | -0.45 (-2.35 to 1.49) | 0.02                    | -2.05 (-3.88 to -0.18)        | 1.65 (-0.02 to 3.36)  | 0.00                    |
| PM <sub>10</sub>             | -2.23 (-3.74 to -0.69)                      | 0.12 (-1.19 to 1.44)  | 0.03                    | -1.32 (-2.61 to -0.00)        | 0.65 (-0.49 to 1.80)  | 0.03                    |
| PM <sub>coarse</sub>         | -1.74 (-3.32 to -0.12)                      | 0.18 (-1.16 to 1.54)  | 0.19                    | -1.50 (-2.84 to -0.14)        | 0.79 (-0.38 to 1.97)  | 0.02                    |
| <b>Primary school</b>        |                                             |                       |                         |                               |                       |                         |
| NO <sub>2</sub>              | -2.95 (-5.00 to -0.85)                      | -1.36 (-3.17 to 0.47) | 0.17                    | -1.71 (-3.46 to 0.08)         | -0.36 (-1.93 to 1.23) | 0.06                    |
| PM <sub>2.5</sub> absorbance | -3.40 (-5.26 to -1.50)                      | -0.83 (-2.46 to 0.84) | 0.03                    | -2.24 (-3.83 to -0.61)        | 0.74 (-0.70 to 2.20)  | 0.00                    |
| PM <sub>2.5</sub>            | -3.92 (-6.05 to -1.74)                      | -0.61 (-2.47 to 1.29) | 0.01                    | -2.55 (-4.39 to -0.68)        | 1.59 (-0.05 to 3.26)  | 0.00                    |
| PM <sub>10</sub>             | -2.44 (-3.97 to -0.89)                      | -0.24 (-1.58 to 1.12) | 0.03                    | -1.64 (-2.95 to -0.31)        | 0.40 (-0.77 to 1.58)  | 0.02                    |
| PM <sub>coarse</sub>         | -2.04 (-3.72 to -0.33)                      | -0.17 (-1.53 to 1.20) | 0.13                    | -1.72 (-3.14 to -0.28)        | 0.63 (-0.55 to 1.83)  | 0.02                    |
| <b>Secondary school</b>      |                                             |                       |                         |                               |                       |                         |
| NO <sub>2</sub>              | -3.12 (-5.13 to -1.06)                      | -1.62 (-3.35 to 0.15) | 0.17                    | -1.67 (-3.40 to 0.09)         | -0.43 (-1.94 to 1.10) | 0.05                    |
| PM <sub>2.5</sub> absorbance | -3.27 (-5.15 to -1.36)                      | -0.90 (-2.54 to 0.77) | 0.04                    | -2.15 (-3.76 to -0.51)        | 0.80 (-0.65 to 2.27)  | 0.00                    |
| PM <sub>2.5</sub>            | -4.00 (-6.15 to -1.81)                      | -0.63 (-2.52 to 1.30) | 0.01                    | -2.81 (-4.66 to -0.93)        | 1.70 (0.03 to 3.40)   | 0.00                    |
| PM <sub>10</sub>             | -2.28 (-3.83 to -0.71)                      | -0.22 (-1.59 to 1.17) | 0.03                    | -1.72 (-3.04 to -0.39)        | 0.54 (-0.66 to 1.75)  | 0.01                    |
| PM <sub>coarse</sub>         | -2.38 (-4.06 to -0.67)                      | -0.48 (-1.82 to 0.88) | 0.08                    | -2.12 (-3.54 to -0.67)        | 0.49 (-0.68 to 1.68)  | 0.00                    |

Adjusted for age, log-transformations of weight and height, parental education, maternal atopy, paternal atopy, breastfeeding, respiratory infections in the last 3 weeks, Dutch nationality, indoor tobacco smoke exposure in the home at 3 months, maternal smoking in pregnancy, furry pets at 3 months, mould in the home at 1 year, gas cooking at 3 months, and average air pollution concentrations for the 7 days preceding the lung function measurement.

Exposure increments: 7.8 µg/m<sup>3</sup> for NO<sub>2</sub>, 0.3 10<sup>-5</sup>/m for PM<sub>2.5</sub> absorbance, 1.2 µg/m<sup>3</sup> for PM<sub>2.5</sub>, 0.9 µg/m<sup>3</sup> for PM<sub>10</sub> and 0.5 µg/m<sup>3</sup> for PM<sub>coarse</sub>.

**Table S11. Association of time window average air pollution exposure with FEV<sub>1</sub> and FVC at age 16 stratified by asthma status**

| Exposure                     | Difference in FEV <sub>1</sub> : % (95% CI) |                       |                            | Difference in FVC: % (95% CI) |                       |                            |
|------------------------------|---------------------------------------------|-----------------------|----------------------------|-------------------------------|-----------------------|----------------------------|
|                              | Non-asthmatic<br>(N=632)                    | Asthmatic<br>(N=55)   | P-Value for<br>interaction | Non-asthmatic<br>(N=632)      | Asthmatic<br>(N=55)   | P-Value for<br>interaction |
| <b>Preschool</b>             |                                             |                       |                            |                               |                       |                            |
| NO <sub>2</sub>              | -1.80 (-3.16 to -0.42)                      | 2.96 (-3.18 to 9.49)  | 0.36                       | 3.46 (-0.58 to 7.66)          | -0.51 (-1.73 to 0.73) | 0.93                       |
| PM <sub>2.5</sub> absorbance | -1.95 (-3.24 to -0.64)                      | 2.24 (-3.98 to 8.87)  | 0.48                       | -1.03 (-4.65 to 2.72)         | -0.03 (-1.20 to 1.16) | 0.53                       |
| PM <sub>2.5</sub>            | -2.39 (-3.86 to -0.90)                      | 2.30 (-4.10 to 9.12)  | 0.49                       | -1.48 (-5.57 to 2.78)         | -0.06 (-1.40 to 1.30) | 0.45                       |
| PM <sub>10</sub>             | -1.14 (-2.24 to -0.04)                      | 1.49 (-5.77 to 9.30)  | 0.87                       | -1.07 (-3.79 to 1.73)         | 0.06 (-0.92 to 1.05)  | 0.37                       |
| PM <sub>coarse</sub>         | -0.87 (-1.99 to 0.27)                       | 1.70 (-5.25 to 9.16)  | 0.58                       | 0.38 (-2.88 to 3.76)          | -0.06 (-1.07 to 0.95) | 0.70                       |
| <b>Primary school</b>        |                                             |                       |                            |                               |                       |                            |
| NO <sub>2</sub>              | -2.53 (-3.94 to -1.10)                      | 1.76 (-5.03 to 9.03)  | 0.57                       | 1.70 (-2.34 to 5.91)          | -1.20 (-2.47 to 0.08) | 0.97                       |
| PM <sub>2.5</sub> absorbance | -2.49 (-3.77 to -1.19)                      | 1.32 (-5.38 to 8.50)  | 0.34                       | -1.67 (-5.31 to 2.12)         | -0.56 (-1.72 to 0.62) | 0.67                       |
| PM <sub>2.5</sub>            | -2.69 (-4.13 to -1.23)                      | 0.33 (-3.70 to 4.53)  | 0.24                       | -1.36 (-5.39 to 2.85)         | -0.41 (-1.72 to 0.93) | 0.82                       |
| PM <sub>10</sub>             | -1.59 (-2.68 to -0.50)                      | 1.33 (-3.20 to 7.08)  | 0.61                       | -1.88 (-4.64 to 0.97)         | -0.40 (-1.38 to 0.59) | 0.48                       |
| PM <sub>coarse</sub>         | -1.23 (-2.38 to -0.07)                      | 0.69 (-4.00 to 5.61)  | 0.45                       | -0.80 (-4.28 to 2.81)         | -0.27 (-1.30 to 0.77) | 0.75                       |
| <b>Secondary school</b>      |                                             |                       |                            |                               |                       |                            |
| NO <sub>2</sub>              | -2.83 (-4.19 to -1.45)                      | 0.72 (-4.03 to 5.70)  | 0.27                       | 2.63 (-1.18 to 7.59)          | -1.22 (-2.45 to 0.03) | 0.77                       |
| PM <sub>2.5</sub> absorbance | -2.53 (-3.81 to -1.23)                      | 1.82 (-3.02 to 7.91)  | 0.27                       | -0.97 (-4.78 to 2.99)         | -0.49 (-1.66 to 0.69) | 0.77                       |
| PM <sub>2.5</sub>            | -2.80 (-4.26 to -1.33)                      | 4.12 (-1.19 to 9.71)  | 0.20                       | -0.57 (-4.61 to 3.65)         | -0.54 (-1.87 to 0.81) | 0.48                       |
| PM <sub>10</sub>             | -1.61 (-2.72 to -0.48)                      | 4.01 (-1.68 to 10.03) | 0.47                       | -1.11 (-3.98 to 1.84)         | -0.37 (-1.37 to 0.65) | 0.62                       |
| PM <sub>coarse</sub>         | -1.67 (-2.82 to -0.50)                      | 2.30 (-2.68 to 7.53)  | 0.43                       | -0.13 (-3.18 to 3.03)         | -0.57 (-1.60 to 0.48) | 0.95                       |

Adjusted for sex, age, log-transformations of weight and height, parental education, maternal atopy, paternal atopy, breastfeeding, respiratory infections in the last 3 weeks, Dutch nationality, indoor tobacco smoke exposure in the home at 3 months, maternal smoking in pregnancy, furry pets at 3 months, mould in the home at 1 year, gas cooking at 3 months, and average air pollution concentrations for the 7 days preceding the lung function measurement.

Exposure increments: 7.8 µg/m<sup>3</sup> for NO<sub>2</sub>, 0.3 10<sup>-5</sup>/m for PM<sub>2.5</sub> absorbance, 1.2 µg/m<sup>3</sup> for PM<sub>2.5</sub>, 0.9 µg/m<sup>3</sup> for PM<sub>10</sub> and 0.5 µg/m<sup>3</sup> for PM<sub>coarse</sub>.

**Table S12. Associations of time window average air pollution exposure during preschool and the secondary school time window with FEV<sub>1</sub> and FVC at age 16 in movers with and without mutual adjustment<sup>a</sup>**

| Exposure                     | Difference in FEV <sub>1</sub> : % (95% CI) |                                                      | Difference in FVC: % (95% CI) |                                                      |
|------------------------------|---------------------------------------------|------------------------------------------------------|-------------------------------|------------------------------------------------------|
|                              | Single time-window in model                 | Preschool and secondary school time-windows in model | Single time-window in model   | Preschool and secondary school time-windows in model |
| <b>Preschool</b>             |                                             |                                                      |                               |                                                      |
| NO <sub>2</sub>              | -0.85 (-2.43 to 0.76 )                      | 0.92 (-1.17 to 3.05 )                                | 0.07 (-1.35 to 1.51 )         | 0.41 (-1.17 to 2.02 )                                |
| PM <sub>2.5</sub> absorbance | -0.89 (-2.35 to 0.60 )                      | 0.41 (-1.59 to 2.46 )                                | 0.65 (-0.68 to 2.00 )         | 0.15 (-1.31 to 1.64 )                                |
| PM <sub>2.5</sub>            | -1.18 (-2.87 to 0.54 )                      | 0.04 (-2.34 to 2.47 )                                | 0.91 (-0.64 to 2.48 )         | 0.48 (-1.23 to 2.22 )                                |
| PM <sub>10</sub>             | -0.39 (-1.54 to 0.78 )                      | 0.67 (-13.0 to 16.49 )                               | 0.40 (-0.64 to 1.45 )         | -0.21 (-1.19 to 0.78 )                               |
| PM <sub>coarse</sub>         | -0.37 (-1.58 to 0.85 )                      | 0.52 (-0.88 to 1.93 )                                | 0.07 (-1.01 to 1.17 )         | -0.29 (-1.42 to 0.86 )                               |
| <b>Secondary school</b>      |                                             |                                                      |                               |                                                      |
| NO <sub>2</sub>              | -1.96 (-3.55 to -0.34 )                     | -2.60 (-4.66 to -0.50 )                              | -0.67 (-2.12 to 0.79 )        | -0.93 (-2.62 to 0.78 )                               |
| PM <sub>2.5</sub> absorbance | -1.43 (-2.93 to 0.09 )                      | -1.75 (-3.76 to 0.30 )                               | 0.18 (-1.19 to 1.57 )         | 0.05 (-1.59 to 1.71 )                                |
| PM <sub>2.5</sub>            | -1.49 (-3.20 to 0.26 )                      | -1.55 (-3.90 to 0.87 )                               | 0.44 (-1.13 to 2.04 )         | 0.10 (-1.81 to 2.05 )                                |
| PM <sub>10</sub>             | -0.62 (-1.85 to 0.62 )                      | -0.65 (-2.02 to 0.73 )                               | 0.08 (-1.02 to 1.20 )         | 0.16 (-1.02 to 1.34 )                                |
| PM <sub>coarse</sub>         | -1.39 (-2.63 to -0.13 )                     | -1.57 (-2.99 to -0.13 )                              | -0.41 (-1.54 to 0.73 )        | -0.33 (-1.51 to 0.88 )                               |

Adjusted for sex, age, log-transformations of weight and height, parental education, maternal atopy, paternal atopy, breastfeeding, respiratory infections in the last 3 weeks, Dutch nationality, indoor tobacco smoke exposure in the home at 3 months, maternal smoking in pregnancy, furry pets at 3 months, mould in the home at 1 year, gas cooking at 3 months, and average air pollution concentrations for the 7 days preceding the lung function measurement.

Exposure increments: 7.8 µg/m<sup>3</sup> for NO<sub>2</sub>, 0.3 10<sup>-5</sup>/m for PM<sub>2.5</sub> absorbance, 1.2 µg/m<sup>3</sup> for PM<sub>2.5</sub>, 0.9 µg/m<sup>3</sup> for PM<sub>10</sub> and 0.5 µg/m<sup>3</sup> for PM<sub>coarse</sub>.

**Table S13. Summary of relevant studies assessing associations between air pollution exposure and lung function (growth)**

| Study                                      | Age group | Exposure assessed                                                                                                                                            | Pollutant levels (Range)                                                                                                 | Results                                                                                                                                                           | Effect modification by sex                                                             | Effect modification by Asthma                                               |
|--------------------------------------------|-----------|--------------------------------------------------------------------------------------------------------------------------------------------------------------|--------------------------------------------------------------------------------------------------------------------------|-------------------------------------------------------------------------------------------------------------------------------------------------------------------|----------------------------------------------------------------------------------------|-----------------------------------------------------------------------------|
| <b>Lung function growth in adolescence</b> |           |                                                                                                                                                              |                                                                                                                          |                                                                                                                                                                   |                                                                                        |                                                                             |
| Gauderman et al 2000, CHS (USA) [1]        | 9-10      | Annual average PM <sub>10</sub> , PM <sub>2.5</sub> , PM <sub>10-2.5</sub> , NO <sub>2</sub> , O <sub>3</sub> , inorganic acid vapor assessed at study entry | PM <sub>10</sub> : 18-70 µg/m <sup>3</sup><br>PM <sub>2.5</sub> : 7- 36 µg/m <sup>3</sup><br>NO <sub>2</sub> : 5- 43 ppb | PM <sub>10</sub> , PM <sub>2.5</sub> , PM <sub>10-2.5</sub> , NO <sub>2</sub> , and inorganic acid vapor associated with reduced FEV <sub>1</sub> and FVC growth, | No effect modification                                                                 | No effect modification                                                      |
| Gauderman et al 2002, CHS (USA) [2]        | 9-10      | Annual average NO <sub>2</sub> , PM <sub>10</sub> , PM <sub>2.5</sub> , O <sub>3</sub> , acid vapor, elemental carbon assessed at study entry                | PM <sub>10</sub> : 10-73 µg/m <sup>3</sup><br>PM <sub>2.5</sub> : 7-30 µg/m <sup>3</sup><br>NO <sub>2</sub> : 3-40 ppb   | Acid vapor associated with reduced FEV <sub>1</sub> but not FVC growth                                                                                            | No effect modification                                                                 | No effect modification                                                      |
| Gauderman et al 2004, CHS (USA) [3]        | 10-18     | Annual average NO <sub>2</sub> , PM <sub>10</sub> , PM <sub>2.5</sub> , O <sub>3</sub> , acid vapor, elemental carbon assessed at study entry                | PM <sub>10</sub> : 10-63 µg/m <sup>3</sup><br>PM <sub>2.5</sub> : 7- 28 µg/m <sup>3</sup><br>NO <sub>2</sub> : 3- 40 ppb | NO <sub>2</sub> , PM <sub>2.5</sub> , O <sub>3</sub> , acid vapor, elemental carbon associated with reduced FEV <sub>1</sub> growth                               | Stronger associations in boys, but no statistically significant differences with girls | Significant associations in subgroups of children with no history of asthma |
| Gauderman et al 2007, CHS (USA) [4]        | 10-18     | Traffic proximity at study entry                                                                                                                             | -                                                                                                                        | Associated with FEV <sub>1</sub> but not FVC growth                                                                                                               | Stronger associations in boys than in girls, non-significant differences               | Significant effects in subgroups of children who never had asthma           |
| Schultz et al 2016, BAMSE (Sweden)* [5]    | 16        | Time weighted annual averages of NO <sub>x</sub> and PM <sub>10</sub> since birth                                                                            | PM <sub>10</sub> : 0.2-22 µg /m <sup>3</sup><br>Median: 4.5 µg/m <sup>3</sup>                                            | Exposure to NO <sub>x</sub> and PM <sub>10</sub> not associated with FEV <sub>1</sub> growth from 8-16 years                                                      | Significant associations in boys                                                       | Associations in non-asthmatics                                              |
| <b>Lung function level</b>                 |           |                                                                                                                                                              |                                                                                                                          |                                                                                                                                                                   |                                                                                        |                                                                             |
| Rice et al, 2016, (USA) [6]                | 7         | Lifetime exposure to PM <sub>2.5</sub> and black carbon since birth                                                                                          | PM <sub>2.5</sub> : 18-28 µg/m <sup>3</sup><br>Median: 10.7 µg/m <sup>3</sup>                                            | PM <sub>2.5</sub> and black carbon associated with FVC but not FEV <sub>1</sub> and                                                                               | No effect modification                                                                 | No effect modification                                                      |

**Table S13. (continued)**

| <b>Study</b>                                   | <b>Age group</b> | <b>Exposure assessed</b>                                                                                                                                      | <b>Range and means/medians of pollutant levels</b>                                                                                                                                                                                                                                                                                                                                                                           | <b>Results</b>                                                                                                                              | <b>Effect modification by sex</b>                                             | <b>Effect modification by Asthma</b>                                                                                   |
|------------------------------------------------|------------------|---------------------------------------------------------------------------------------------------------------------------------------------------------------|------------------------------------------------------------------------------------------------------------------------------------------------------------------------------------------------------------------------------------------------------------------------------------------------------------------------------------------------------------------------------------------------------------------------------|---------------------------------------------------------------------------------------------------------------------------------------------|-------------------------------------------------------------------------------|------------------------------------------------------------------------------------------------------------------------|
| Schultz et al 2012, BAMSE (Sweden)* [7]        | 8                | PM <sub>10</sub> , NO <sub>x</sub> assessed from birth                                                                                                        | PM <sub>10</sub> : 6-30.9 µg/m <sup>3</sup><br>Mean: 15.7 µg/m <sup>3</sup>                                                                                                                                                                                                                                                                                                                                                  | First year of life PM <sub>10</sub> exposure associated with lower FEV <sub>1</sub>                                                         | Stronger associations in boys                                                 | Stronger effects in those with asthma                                                                                  |
| Gehring et al 2013, PIAMA (Netherlands) [8]*   | 8                | Annual average NO <sub>2</sub> , NO <sub>x</sub> , PM <sub>2.5</sub> , PM <sub>10</sub> , and PM <sub>coarse</sub> , PM <sub>2.5</sub> absorbance since birth | PM <sub>10</sub> : 23.7-29.8 µg/m <sup>3</sup><br>Mean: 24.8 µg/m <sup>3</sup><br>PM <sub>2.5</sub> : 14.9- 19.3 µg/m <sup>3</sup><br>Mean: 16.3 µg/m <sup>3</sup><br>NO <sub>2</sub> : 9.4-52.1 µg/m <sup>3</sup><br>Mean: 22.2 µg/m <sup>3</sup><br>PM <sub>2.5</sub> abs: 0.8- 2.1 10 <sup>-5</sup> /m<br>Mean: 1.2 µg/m <sup>3</sup><br>PM <sub>coarse</sub> : 7.6-11.2 µg/m <sup>3</sup><br>Mean: 8.3 µg/m <sup>3</sup> | NO <sub>2</sub> , NO <sub>x</sub> , PM <sub>2.5</sub> absorbance, and PM <sub>2.5</sub> at current address associated with FEV <sub>1</sub> | No effect modification                                                        | No effect modification                                                                                                 |
| Oftedal et al, 2008, Oslo (Norway) [9]         | 9-10             | Lifetime exposures to NO <sub>2</sub> , PM <sub>2.5</sub> , PM <sub>10</sub>                                                                                  | PM <sub>10</sub> : 10-17 µg/m <sup>3</sup><br>Mean: 14.5 µg/m <sup>3</sup><br>PM <sub>2.5</sub> : 5- 19 µg/m <sup>3</sup><br>Mean: 12.3 µg/m <sup>3</sup><br>NO <sub>2</sub> : 3- 65 µg/m <sup>3</sup><br>Mean: 29.0 µg/m <sup>3</sup>                                                                                                                                                                                       | Early life and lifetime exposure to NO <sub>2</sub> , PM <sub>2.5</sub> , PM <sub>10</sub> associated with FVC, PEF, FEV <sub>1</sub>       | Stronger associations in girls                                                | Not assessed                                                                                                           |
| Peters et al 1999, CHS (USA) [10]              | 9-16             | 24 h/-week averages of PM <sub>10</sub> , PM <sub>2.5</sub> , O <sub>3</sub> and NO <sub>2</sub> , acid vapor assessed at study entry                         | PM <sub>10</sub> : 13-70.7 µg/m <sup>3</sup><br>Mean: 34.9 µg/m <sup>3</sup><br>PM <sub>2.5</sub> : 6.7- 31.5 µg/m <sup>3</sup><br>Mean: 15.1 µg/m <sup>3</sup><br>NO <sub>2</sub> : 2.7- 42.6 ppb<br>Mean: 21.5 ppb                                                                                                                                                                                                         | PM <sub>10</sub> , PM <sub>2.5</sub> , and NO <sub>2</sub> significantly associated with lower FVC, FEV <sub>1</sub>                        | Stronger associations in girls                                                | Significant associations between O <sub>3</sub> and FEV <sub>1</sub> in asthmatic girls                                |
| Fuertes et al (2015) GINI/LISA (Germany)* [11] | 15               | Annual averages of NO <sub>2</sub> , PM <sub>10</sub> , PM <sub>2.5</sub> and PM <sub>2.5</sub> absorbance since birth                                        | NO <sub>2</sub> : 11.4-59.7 µg/m <sup>3</sup><br>Median: 21.9 µg/m <sup>3</sup><br>PM <sub>10</sub> : 14.8 -32.7 µg/m <sup>3</sup><br>Median: 22.3 µg/m <sup>3</sup><br>PM <sub>2.5</sub> : 10.6-21.3 µg/m <sup>3</sup><br>Median: 14.2 µg/m <sup>3</sup><br>PM <sub>2.5</sub> abs: 0.9-3.1 10 <sup>-5</sup> /m<br>Median: 1.4 10 <sup>-5</sup> /m <sup>-1</sup>                                                             | No associations observed for either FEV <sub>1</sub> or FVC for all pollutants                                                              | No consistent trends in the associations between sexes in stratified analyses | Negative associations of NO <sub>2</sub> , PM <sub>10</sub> , PM <sub>2.5</sub> with FEV <sub>1</sub> among asthmatics |
| Schultz et al 2016,                            | 16               | Time weighted                                                                                                                                                 | PM <sub>10</sub> : 0.2-22 µg/m <sup>3</sup>                                                                                                                                                                                                                                                                                                                                                                                  | Early life exposure                                                                                                                         | Significant                                                                   | Associations in non-                                                                                                   |

|                   |  |                                                                     |                                                                                                            |                                                                                                    |                      |            |
|-------------------|--|---------------------------------------------------------------------|------------------------------------------------------------------------------------------------------------|----------------------------------------------------------------------------------------------------|----------------------|------------|
| BAMSE (Sweden)[5] |  | annual averages of NO <sub>x</sub> and PM <sub>10</sub> since birth | Median: 4.5 µg/m <sup>3</sup><br>NO <sub>x</sub> : 0.5-50 µg/m <sup>3</sup><br>Median: 6 µg/m <sup>3</sup> | to NO <sub>x</sub> but not PM <sub>10</sub> associated with FEV <sub>1</sub> at age 16 but not FVC | associations in boys | asthmatics |
|-------------------|--|---------------------------------------------------------------------|------------------------------------------------------------------------------------------------------------|----------------------------------------------------------------------------------------------------|----------------------|------------|

---

\*Studies with comparable exposure assessment

**Table S14. Correlation between exposure at school and home addresses for primary and secondary school time windows air pollution exposure (N=627)**

| School address                     | Home address    |           |                              |           |                   |           |                  |           |                      |           |
|------------------------------------|-----------------|-----------|------------------------------|-----------|-------------------|-----------|------------------|-----------|----------------------|-----------|
|                                    | NO <sub>2</sub> |           | PM <sub>2.5</sub> absorbance |           | PM <sub>2.5</sub> |           | PM <sub>10</sub> |           | PM <sub>coarse</sub> |           |
|                                    | primary         | secondary | primary                      | secondary | primary           | secondary | primary          | secondary | primary              | secondary |
| <b>NO<sub>2</sub></b>              |                 |           |                              |           |                   |           |                  |           |                      |           |
| Primary                            | <b>0.88</b>     |           |                              |           |                   |           |                  |           |                      |           |
| Secondary                          |                 | 0.69      |                              |           |                   |           |                  |           |                      |           |
| <b>PM<sub>2.5</sub> absorbance</b> |                 |           |                              |           |                   |           |                  |           |                      |           |
| Primary                            |                 |           | <b>0.82</b>                  |           |                   |           |                  |           |                      |           |
| Secondary                          |                 |           |                              | 0.62      |                   |           |                  |           |                      |           |
| <b>PM<sub>2.5</sub></b>            |                 |           |                              |           |                   |           |                  |           |                      |           |
| Primary                            |                 |           |                              |           | <b>0.85</b>       |           |                  |           |                      |           |
| Secondary                          |                 |           |                              |           |                   | 0.73      |                  |           |                      |           |
| <b>PM<sub>10</sub></b>             |                 |           |                              |           |                   |           |                  |           |                      |           |
| Primary                            |                 |           |                              |           |                   |           | 0.68             |           |                      |           |
| Secondary                          |                 |           |                              |           |                   |           |                  | 0.35      |                      |           |
| <b>PM<sub>coarse</sub></b>         |                 |           |                              |           |                   |           |                  |           |                      |           |
| Primary                            |                 |           |                              |           |                   |           |                  |           | 0.76                 |           |
| Secondary                          |                 |           |                              |           |                   |           |                  |           |                      | 0.36      |

≥0.80=high correlation



Figure S1. Flow diagram of study population from the baseline population

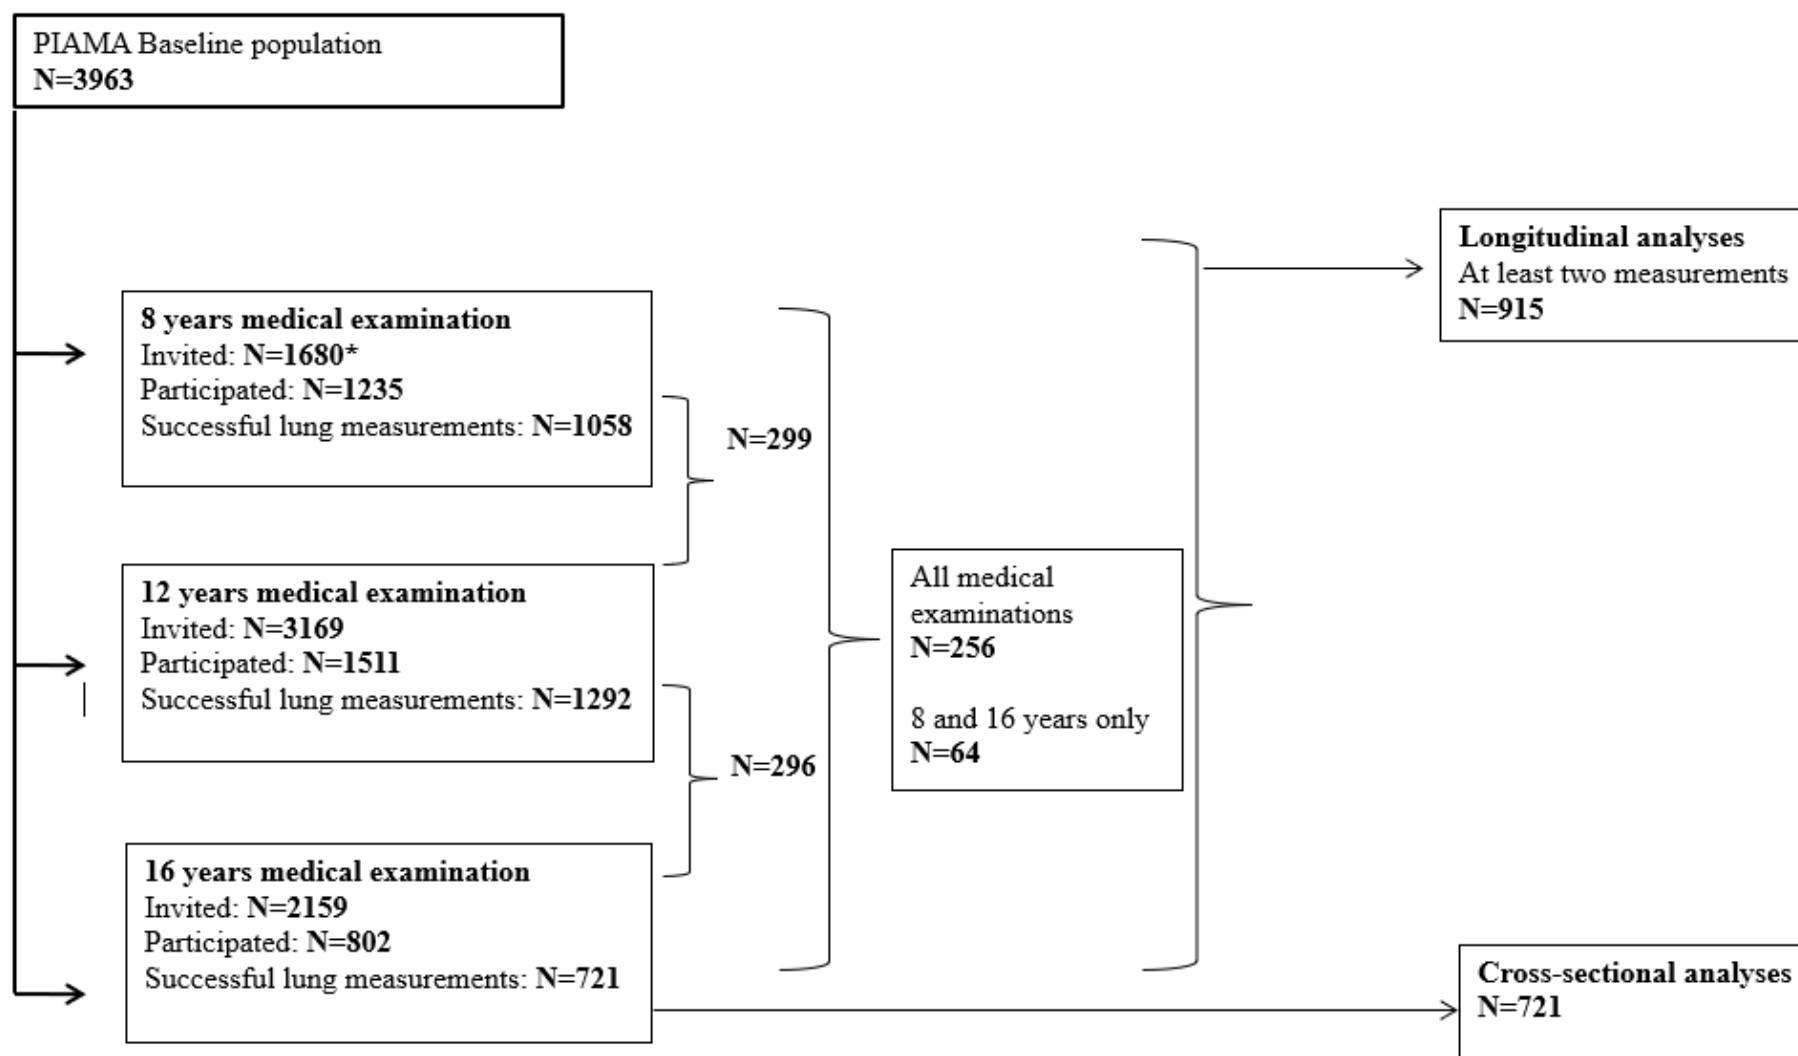

\* Participants invited for the extensive medical follow-up including lung function measurements

## REFERENCES

1. Gauderman WJ, McConnell R, Gilliland F, London S, Thomas D, Avol E, Vora H, Berhane K, Rappaport EB, Lurmann F, Margolis HG, Peters J. Association between air pollution and lung function growth in southern California children. *Am J Respir Crit Care Med* 2000; 162: 1383-1390.
2. Gauderman WJ, Gilliland GF, Vora H, Avol E, Stram D, McConnell R, Thomas D, Lurmann F, Margolis HG, Rappaport EB, Berhane K, Peters JM. Association between air pollution and lung function growth in southern California children: results from a second cohort. *Am J Respir Crit Care Med* 2002; 166: 76-84.
3. Gauderman WJ, Avol E, Gilliland F, Vora H, Thomas D, Berhane K, McConnell R, Kuenzli N, Lurmann F, Rappaport E, Margolis H, Bates D, Peters J. The effect of air pollution on lung development from 10 to 18 years of age. *N Engl J Med* 2004; 351: 1057-1067.
4. Gauderman WJ, Vora H, McConnell R, Berhane K, Gilliland F, Thomas D, Lurmann F, Avol E, Kunzli N, Jerrett M, Peters J. Effect of exposure to traffic on lung development from 10 to 18 years of age: a cohort study. *Lancet* 2007; 369: 571-577.
5. Schultz ES, Hallberg J, Bellander T, Bergstrom A, Bottai M, Chiesa F, Gustafsson PM, Gruzieva O, Thunqvist P, Pershagen G, Melen E. Early-Life Exposure to Traffic-related Air Pollution and Lung Function in Adolescence. *Am J Respir Crit Care Med* 2016; 193: 171-177.
6. Rice MB, Rifas-Shiman SL, Litonjua AA, Oken E, Gillman MW, Kloog I, Luttmann-Gibson H, Zanobetti A, Coull BA, Schwartz J, Koutrakis P, Mittleman MA, Gold DR. Lifetime Exposure to Ambient Pollution and Lung Function in Children. *Am J Respir Crit Care Med* 2016; 193: 881-888.
7. Schultz ES, Gruzieva O, Bellander T, Bottai M, Hallberg J, Kull I, Svartengren M, Melen E, Pershagen G. Traffic-related air pollution and lung function in children at 8 years of age: a birth cohort study. *Am J Respir Crit Care Med* 2012; 186: 1286-1291.
8. Gehring U, Gruzieva O, Agius RM, Beelen R, Custovic A, Cyrys J, Eeftens M, Flexeder C, Fuertes E, Heinrich J, Hoffmann B, de Jongste JC, Kerkhof M, Klumper C, Korek M, Molter A, Schultz ES, Simpson A, Sugiri D, Svartengren M, von Berg A, Wijga AH, Pershagen G, Brunekreef B. Air pollution exposure and lung function in children: the ESCAPE project. *Environ Health Perspect* 2013; 121: 1357-1364.
9. Oftedal B, Brunekreef B, Nystad W, Madsen C, Walker SE, Nafstad P. Residential outdoor air pollution and lung function in schoolchildren. *Epidemiology* 2008; 19: 129-137.

10. Peters JM, Avol E, Gauderman WJ, Linn WS, Navidi W, London SJ, Margolis H, Rappaport E, Vora H, Gong H, Jr., Thomas DC. A study of twelve Southern California communities with differing levels and types of air pollution. II. Effects on pulmonary function. *Am J Respir Crit Care Med* 1999; 159: 768-775.
11. Fuertes E, Bracher J, Flexeder C, Markevych I, Klumper C, Hoffmann B, Kramer U, von Berg A, Bauer CP, Koletzko S, Berdel D, Heinrich J, Schulz H. Long-term air pollution exposure and lung function in 15 year-old adolescents living in an urban and rural area in Germany: The GINIplus and LISApplus cohorts. *Int J Hyg Environ Health* 2015; 218: 656-665.
